# Supplementary material for: Epitaxial growth of β-Ga2O3 (−201) thin film on four-fold symmetry CeO2 (001) substrate for heterogeneous integrations
Source: Royal Society of Chemistry journal article supplement (doi:10.1039/d1tc02852a), 2021-01-01
Supplement: d1tc02852a1.pdf [file d1tc02852a1.pdf]

## Epitaxial growth of $\beta$ -Ga<sub>2</sub>O<sub>3</sub> (-201) thin film on fourfold symmetry CeO<sub>2</sub> (001) substrate for heterogeneous integrations

Xiao Tang<sup>1\*</sup>, Kuang-Hui Li<sup>1</sup>, Che-Hao Liao<sup>1</sup>, Dongxing Zheng<sup>2</sup>, Chen Liu<sup>2</sup>, Rongyu Lin<sup>1</sup>, Na Xiao<sup>1</sup>, Shibin Krishna<sup>1</sup>, Jose Tapoada<sup>1</sup>, Xiaohang Li<sup>1</sup>

<sup>1</sup> Advanced Semiconductor Laboratory, King Abdullah University of Science and Technology (KAUST), Thuwal 23955-6900, Saudi Arabia

<sup>2</sup> Division of Physical Science and Engineering (PSE), King Abdullah University of Science and Technology (KAUST), Thuwal 23955-6900, Saudi Arabia

\*[xiao.tang@kaust.edu.sa](mailto:xiao.tang@kaust.edu.sa)

Two dimensional Silvaco Atlas TCAD simulation [1] was carried out to understand the spectral response of Ga<sub>2</sub>O<sub>3</sub> thin film PDs grown on CeO<sub>2</sub>. The band alignment of the  $\beta$ -Ga<sub>2</sub>O<sub>3</sub> and CeO<sub>2</sub> are set exactly as in the Figure 4. (e). The schematic diagram of the simulated Ga<sub>2</sub>O<sub>3</sub> thin film PD grown on CeO<sub>2</sub> is shown in Figure S1. (a). The thickness of the Ga<sub>2</sub>O<sub>3</sub> and CeO<sub>2</sub> thin film are set to 300 nm and 20 nm, respectively. The spectral response at a bias of 5V when the beam intensity equals to 20  $\mu$ W/cm<sup>2</sup> and 1 mW/cm<sup>2</sup> are shown in the **Figure S1**. (b) and (c). Based on our simulation result, the spectral response only shows a single peak around 250 nm when the beam intensity equals to 20  $\mu$ W/cm<sup>2</sup>, which agrees with our experimental result. This behavior could be explained by the thickness of the CeO<sub>2</sub> thin film is much less than the above Ga<sub>2</sub>O<sub>3</sub> film. Moreover, by artificially increasing the beam intensity to extremely large value (1 mW/cm<sup>2</sup>), we can see that an additional peak around 350 nm comes out. Thus, we conclude that only the peak of Ga<sub>2</sub>O<sub>3</sub> in our simulated PD spectral response can be observed when the beam intensity equals to 20  $\mu$ W/cm<sup>2</sup>.

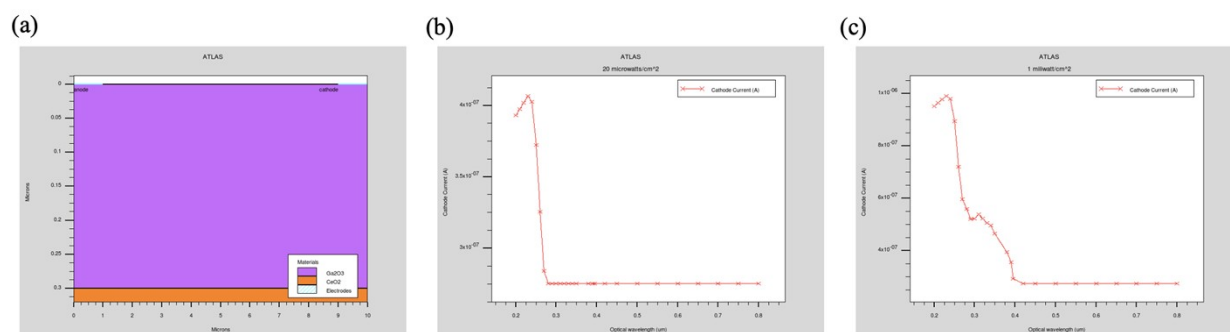

**Figure S1.** (a). Schematic diagram of the simulated Ga<sub>2</sub>O<sub>3</sub> thin film PD grown on CeO<sub>2</sub>. (b). The spectral response at a bias of 5 V under the beam intensity equals to 20  $\mu$ W/cm<sup>2</sup>. (c). The spectral response at a bias of 5 V under the beam intensity equals to 1 mW/cm<sup>2</sup>.

## Reference

[1] Atlas User's Manual, Silvaco, Santa Clara, CA, USA, 2018.
